# Supplementary material for: Eligibility for faricimab in a real-world neovascular age-related macular degeneration population: a cross-sectional study
Source: HighWire-hosted journal article supplement (doi:10.1136/bmjopen-2022-065001), 2022-09-01
Supplement: bmjopen-2022-065001supp001_data_supplement.pdf [file bmjopen-2022-065001supp001_data_supplement.pdf]

**Supplementary Table 1.** Sensitivity analyses without the missing category for the eligible SMR population compared to the TENAYA and LUCERNE populations.

| Characteristics                    | SMR<br>n = 13,265 | TENAYA<br>n = 334 | p      | LUCERNE<br>n = 331 | p      |
|------------------------------------|-------------------|-------------------|--------|--------------------|--------|
| <b>Time since AMD-diagnosis*</b>   |                   |                   | 0.111  |                    | <0.001 |
| ≤ 1 month                          | 9710 (82%)        | 248 (79%)         |        | 221 (70%)          |        |
| >1 month                           | 2066 (18%)        | 66 (21%)          |        | 96 (30%)           |        |
| <b>CNV location, n (%)</b>         |                   |                   | <0.001 |                    | <0.001 |
| Subfoveal                          | 7161 (71%)        | 201 (61%)         |        | 209 (65%)          |        |
| Juxtafoveal                        | 2292 (23%)        | 88 (27%)          |        | 73 (23%)           |        |
| Extrafoveal                        | 662 (7%)          | 41 (12%)          |        | 42 (13%)           |        |
| <b>CNV lesion type, n (%)</b>      |                   |                   | <0.001 |                    | <0.001 |
| Occult**                           | 4139 (52%)        | 177 (55%)         |        | 171 (54%)          |        |
| Classic, including mixed membranes | 2439 (31%)        | 133 (41%)         |        | 134 (42%)          |        |
| RAP                                | 1319 (17%)        | 14 (4%)           |        | 14 (4%)            |        |

AMD, age-related macular degeneration; CNV, choroidal neovascularization; PCV, polypoidal choroidal vasculopathy; SMR, The Swedish Macula Register; RAP, retinal angiomatous proliferation.

\* 135 cases with a diagnosis time >365 days excluded from SMR.

\*\* 418 PCV cases included.
